# Supplementary material for: Improved Dual-Luciferase Reporter Assays for Nuclear Receptors
Source: PubMed Central journal article supplement — Curr Chem Genomics. 2010 May 26;4:43–9. doi: 10.2174/1875397301004010043 (PMC3115594; doi:10.2174/1875397301004010043), 2010-05-26
Supplement: TOCHGENJ-4-43_SD1.pdf [file TOCHGENJ-4-43_SD1.pdf]

## SUPPLEMENTARY MATERIAL

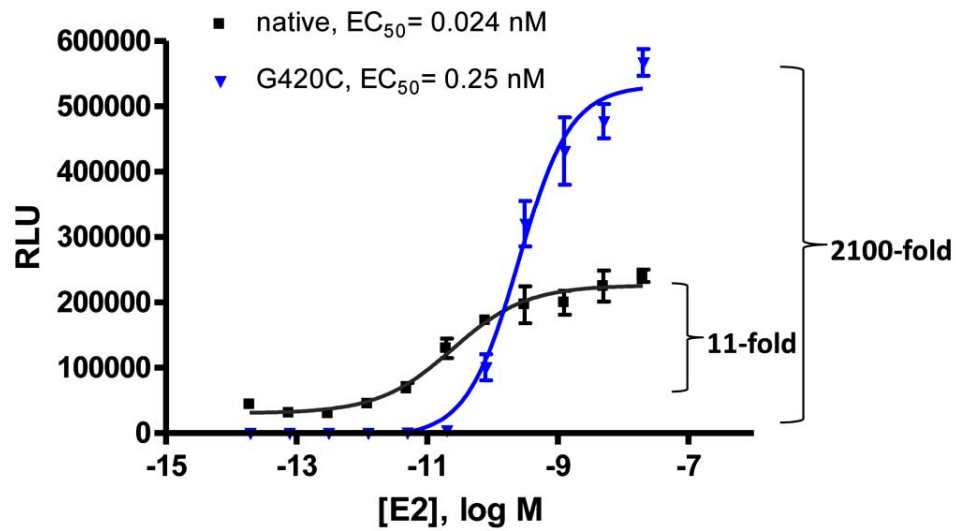

**Supplementary Fig. (1).** Stable GloResponse<sup>TM</sup> 9XGAL4UAS-luc2P HEK293 cell line was transiently transfected with pBIND-ER containing either the ER $\alpha$  Genbank sequence (native) or the mutant (G420C) in a 10 cm dish. One day later, cells were transferred to 384-well plates containing a serial dilution of E2. Luminescence was quantified using Dual-Glo<sup>TM</sup> Assay System, on the Thermo VarioSkan multimode reader. The mutant ER-LBD shows a lower background and higher induced expression levels, yielding a larger dynamic range. It also shows a right shift in  $EC_{50}$ .
